# Supplementary material
Source: PubMed Central journal article supplement (PMC9378496)

# Supplementary Figure 1

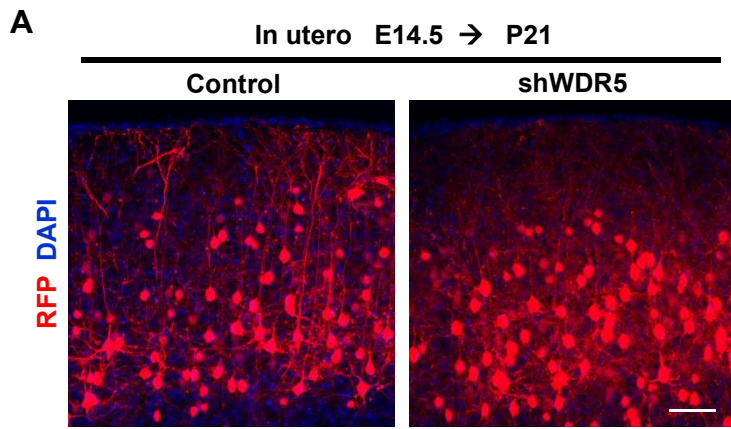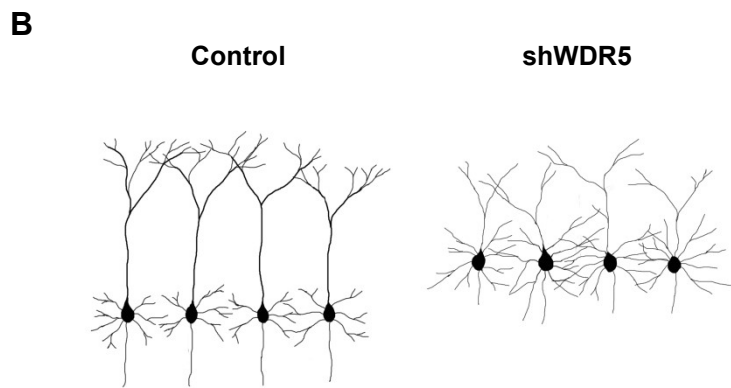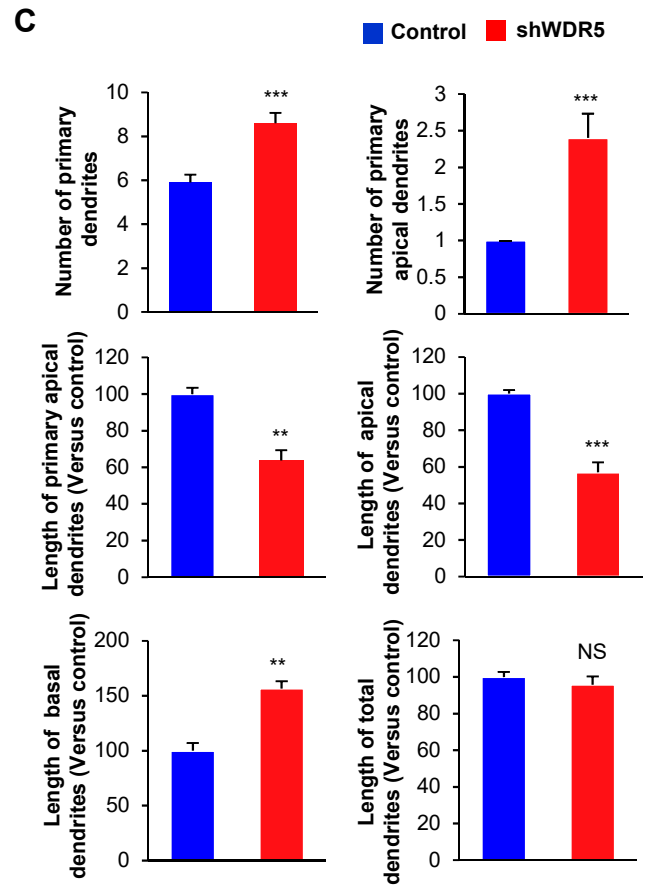

# Supplementary Figure 2

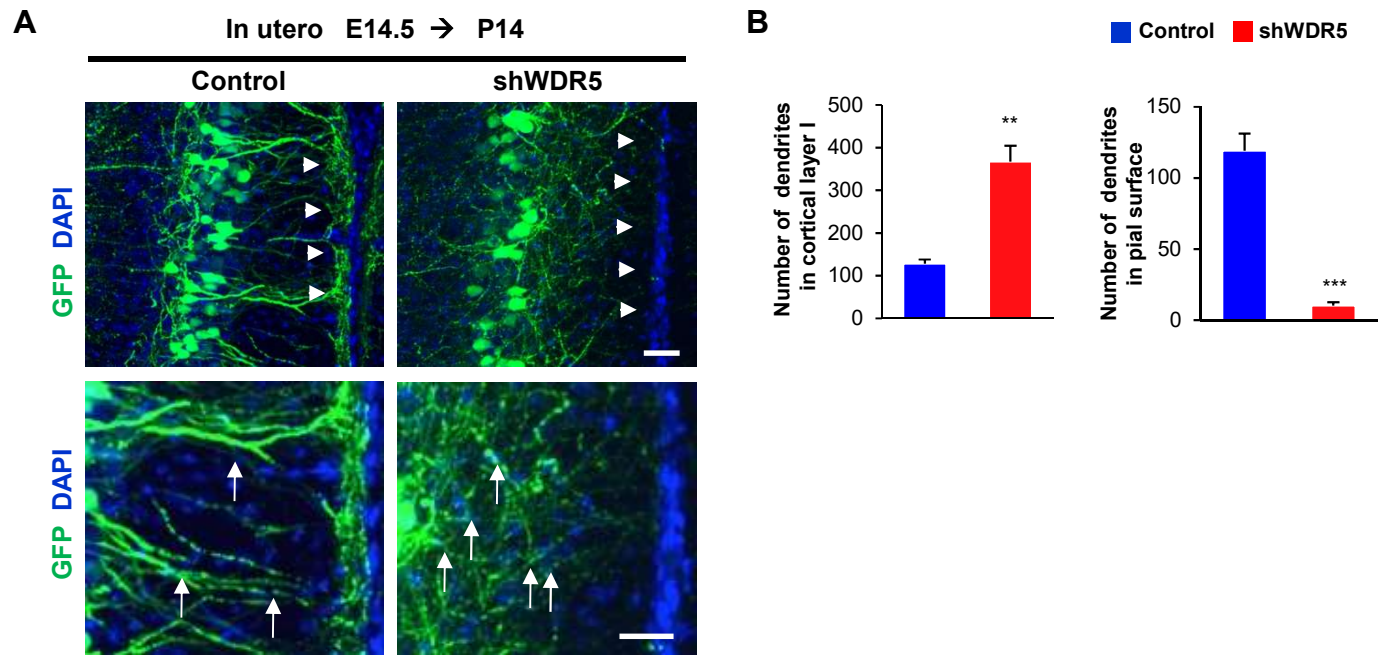

Supplement: NIHMS1812965-supplement-1.pdf [file NIHMS1812965-supplement-1.pdf]
